# Supplementary material for: Prediction of Lymph Node Metastasis in Colorectal Cancer Based on Clinical Data, Body Composition, and Radiomics
Source: Research Square preprint supplement (doi:10.21203/rs.3.rs-8511709/v1), 2026-02-16
Supplement: Supplementary file 1 [file 1cad856f2c48180352eab518.docx]

| 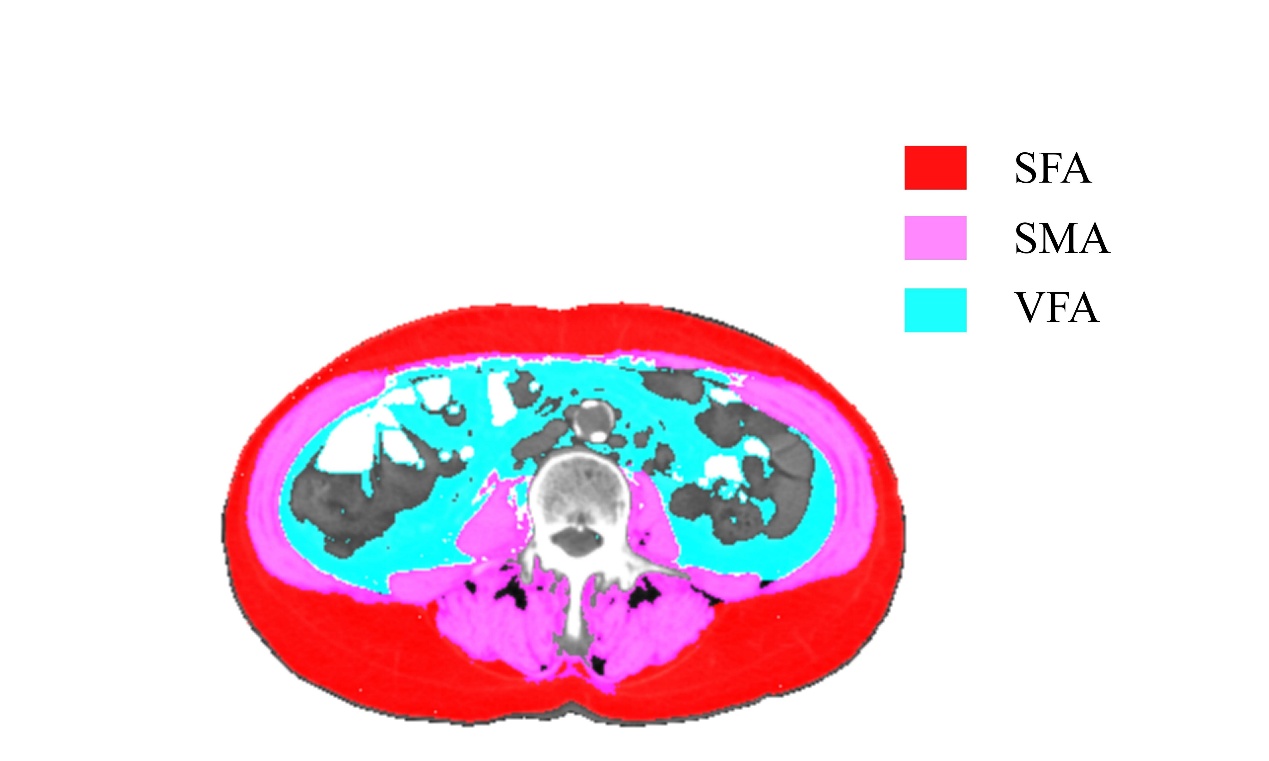 |
| --- |
| **Supplementary Figure 1A. Measurement of skeletal muscle and fat cross-sectional area at the L3 vertebral level in CT scans of CRC patients without LNM**. LNM = lymph node metastasis, CRC = colorectal cancer. |

| 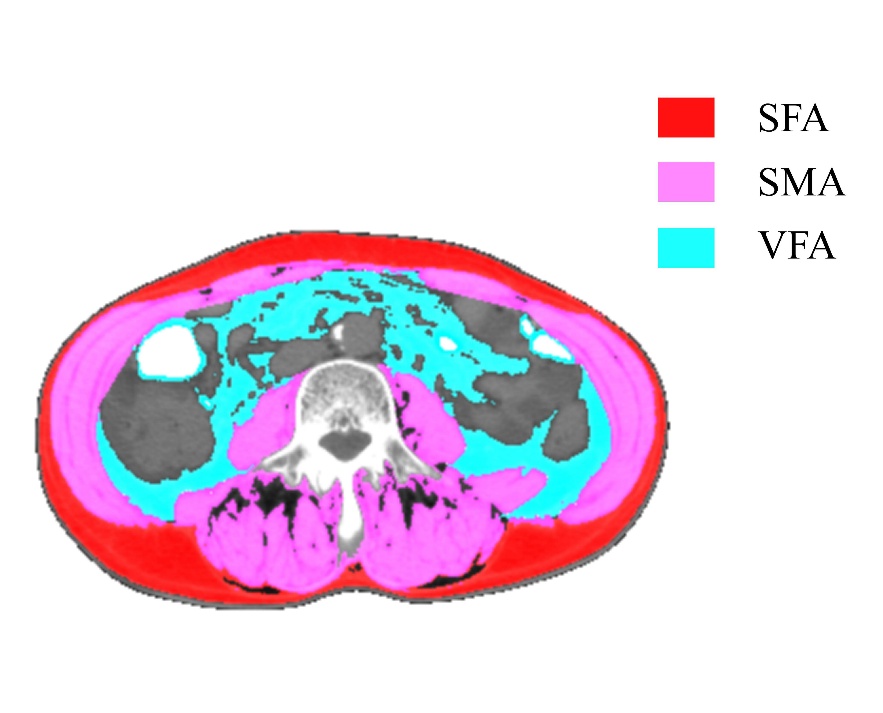 |
| --- |
| **Supplementary Figure 1B. Measurement of skeletal muscle and fat cross-sectional area at the L3 vertebral level in CT scans of CRC patients with LNM**. LNM = lymph node metastasis, CRC = colorectal cancer. |

| 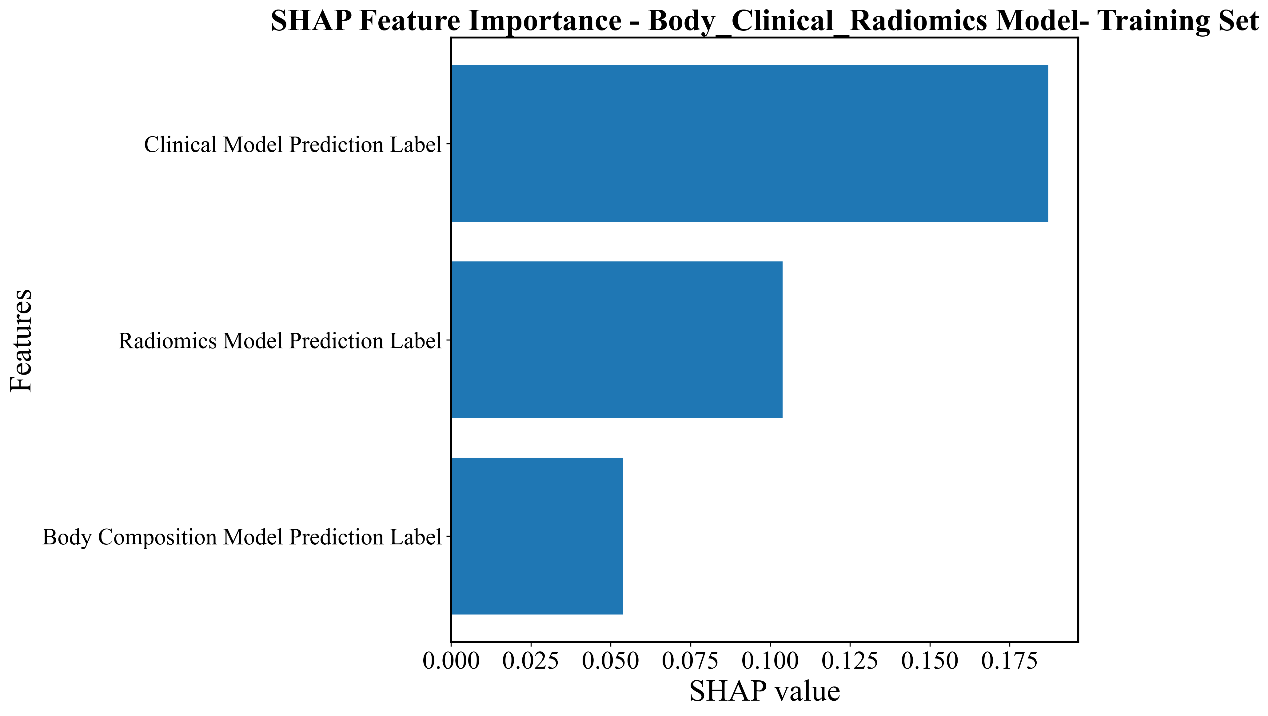 |
| --- |
| **Supplementary Figure 2A.** **Histogram of SHAP values for the Body_Clinical_Radiomics model in the training set**. This Figurer displays the global feature importance of the Body_Clinical_Radiomics model, sorted by absolute SHAP values. SHAP = Shapley Additive Property. |

| 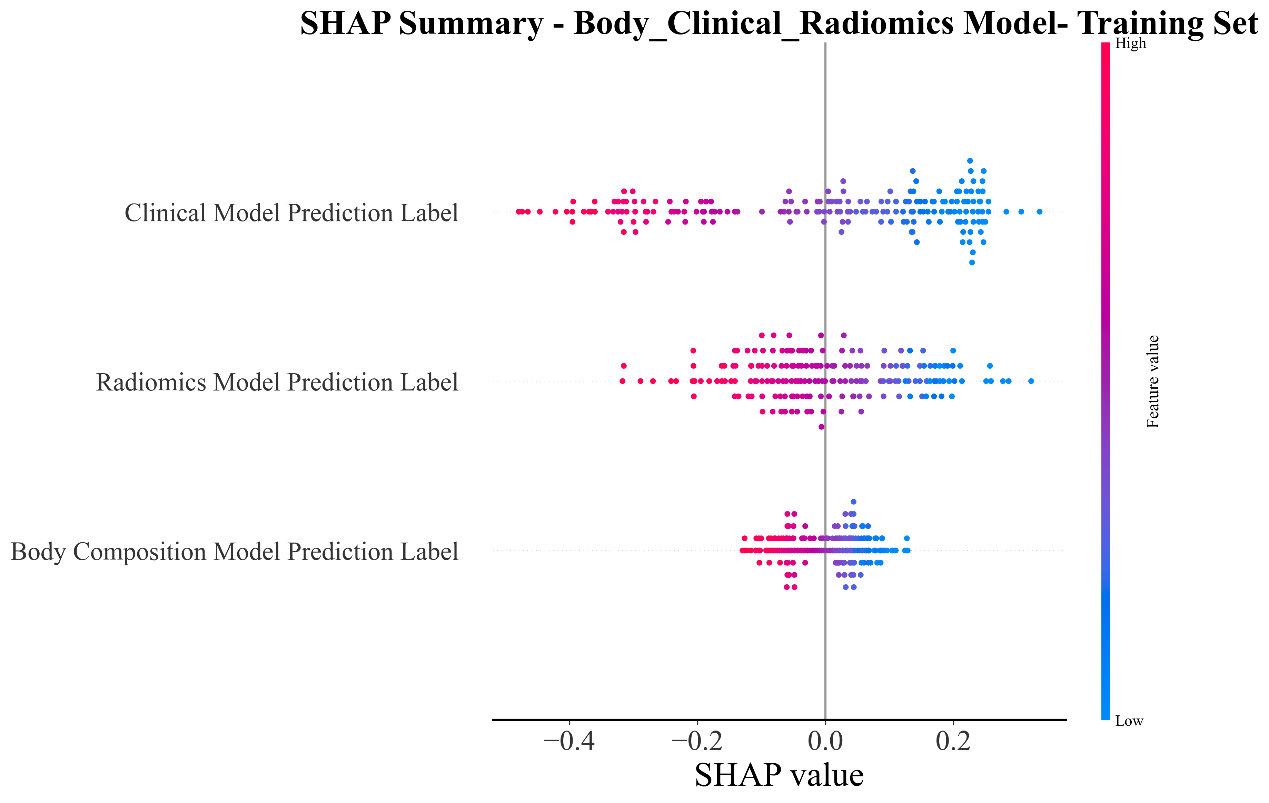 |
| --- |
| **Supplementary Figure 2B. Summary plot of SHAP values for the Body_Clinical_Radiomics model in the training set.** This Figure displays the distribution of SHAP values across all samples in the Body_Clinical_Radiomics model. SHAP = Shapley Additive Property. |

| 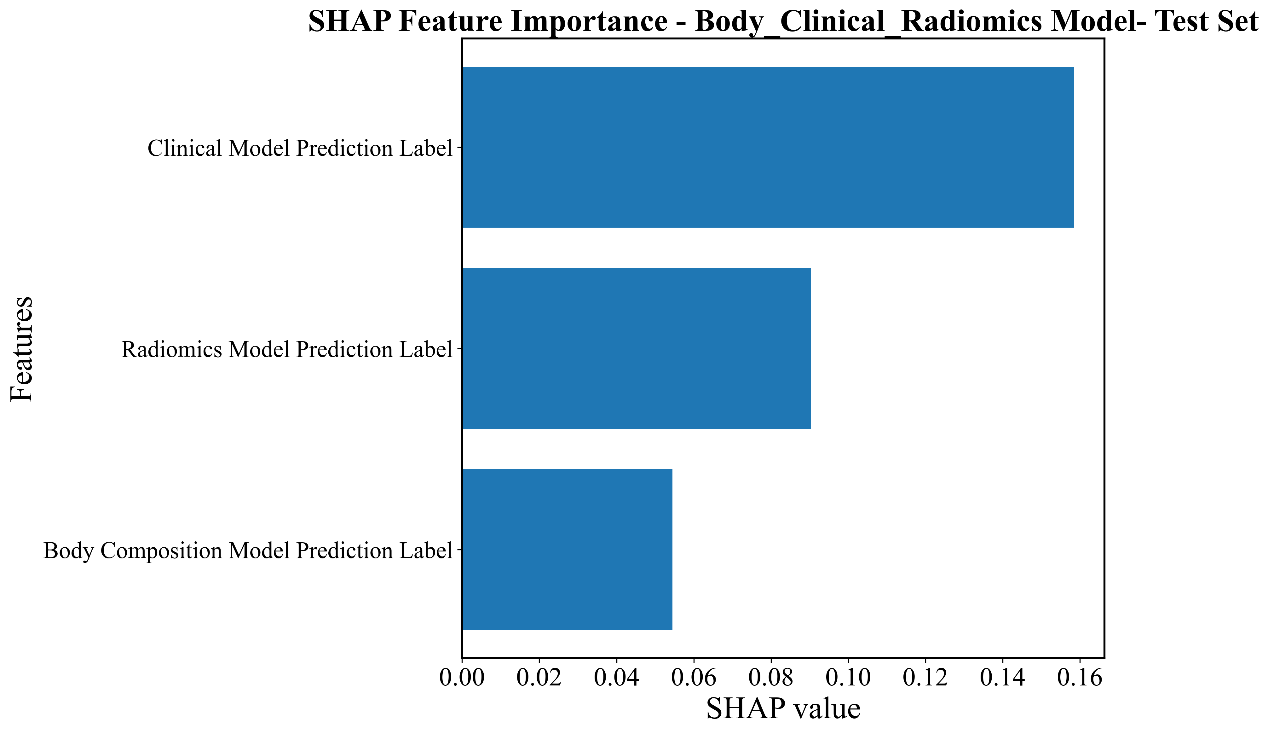 |
| --- |
| **Supplementary Figure 2C.** **Histogram of SHAP values for the Body_Clinical_Radiomics model in the test set**. This Figure displays the global feature importance of the Body_Clinical_Radiomics model, sorted by absolute SHAP values. SHAP = Shapley Additive Property. |

| 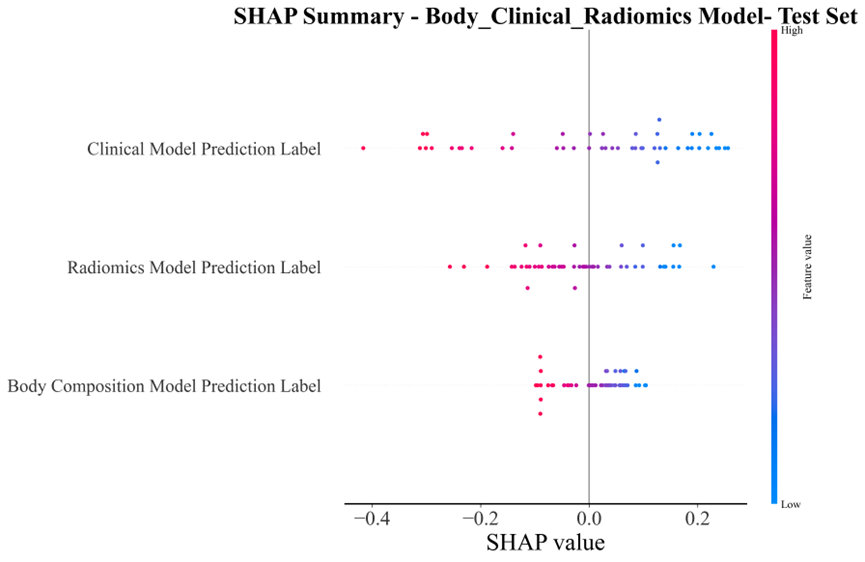 |
| --- |
| **Supplementary Figure 2D. Summary plot of SHAP values for the Body_Clinical_Radiomics model in the test set.** This Figure displays the distribution of SHAP values across all samples in the Body_Clinical_Radiomics model. SHAP = Shapley Additive Property. |
